# Supplementary material for: Insc:LGN tetramers promote asymmetric divisions of mammary stem cells
Source: PubMed Central journal article supplement (PMC5844954; doi:10.1038/s41467-018-03343-4), 2018-03-09
Supplement: 41467_2018_3343_MOESM3_ESM.pdf [file 41467_2018_3343_MOESM3_ESM.pdf]

### **Description of Additional Supplementary Files**

File Name: Supplementary Movie 1

Description: Animated summary of the close-up views at the interface between subunits of the dLGN-TPR:Insc-ASYM tetramer.

File Name: Supplementary Movie 2

Description: Morphing between the extended and compact conformers of the dLGN-TPR:Insc-ASYM tetramer.
